# Supplementary material for: A piezoelectric poly(vinylidene fluoride) tube featuring highly-sensitive and isotropic piezoelectric output for compression
Source: Royal Society of Chemistry journal article supplement (doi:10.1039/d0ra09131f), 2021-01-01
Supplement: d0ra09131f1.pdf [file d0ra09131f1.pdf]

Electronic Supplementary Information (ESI)

**Piezoelectric poly(vinylidene fluoride) tube featuring highly-sensitive and isotropic piezoelectric output to compression**

Jiajun Guo, Min Nie\*, Qi Wang

Address: State Key Laboratory of Polymer Materials Engineering, Polymer Research

Institute of Sichuan University, Chengdu 610065, China

Email: [poly.nie@gmail.com](mailto:poly.nie@gmail.com)

Fax: +86-28-85402465

Tel: +86-28-85405133

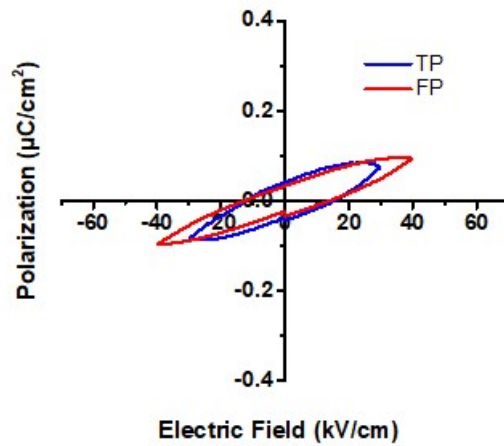

Figure S1 the hysteresis loop of FS and TS samples at 1Hz.

For easy measurement, the tube was cut and compressed into a plate-like sample with an area size of  $5 \times 5$  (length  $\times$  width)  $\text{mm}^2$  and a thickness of 0.27 mm. The polarization-electric field (P-E) hysteresis loop was conducted using a standardized ferroelectric test system at room temperature and a frequency of 1 Hz. Obviously, PVDF-HFP tube and film demonstrated an instantaneous remanent polarization of  $\sim 0.04 \mu\text{C}/\text{cm}^2$ , which was an important indicator for piezoelectric output.

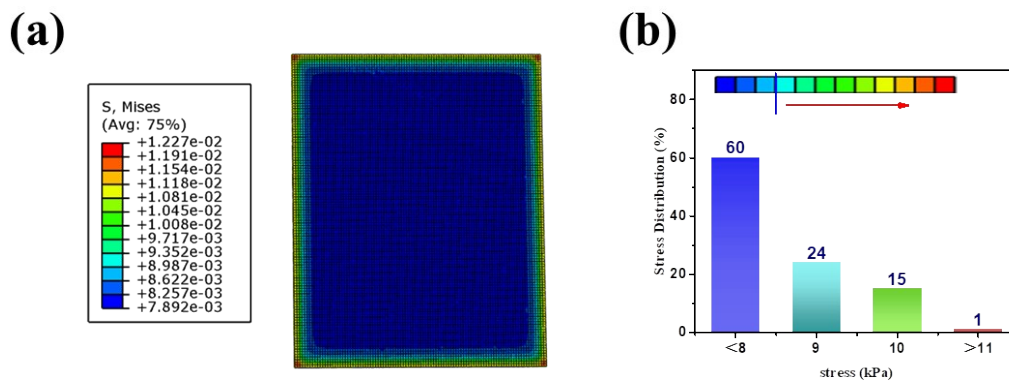

Figure S2 Two-dimensional stress distribution pattern (a) and statistic results of stress distribution (b) at the corresponding load threshold of 1.25N.
